# Supplementary material
Source: PubMed Central journal article supplement (PMC5643234)

Supplemental Figure: Cumulative incidence of local failure

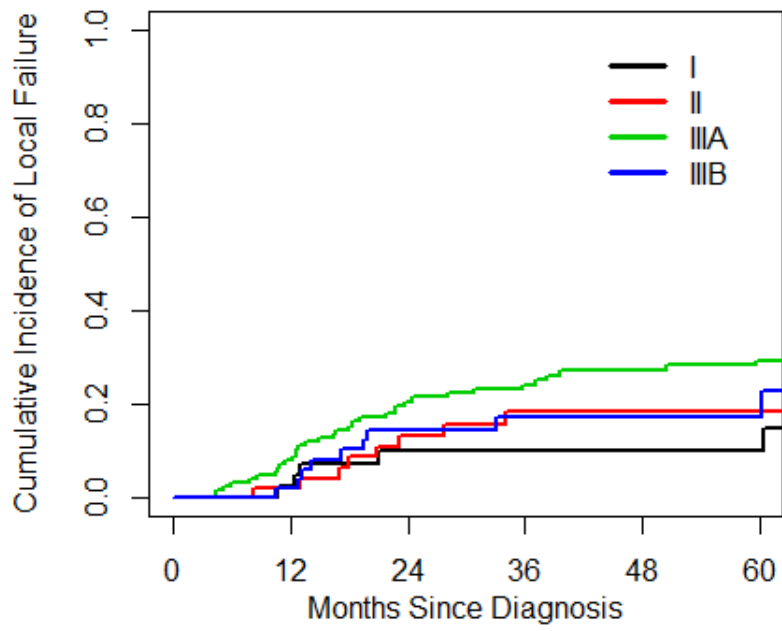

**No. At Risk**

|      |     |    |    |    |    |    |
|------|-----|----|----|----|----|----|
| I    | 46  | 31 | 20 | 18 | 13 | 11 |
| II   | 53  | 41 | 24 | 16 | 13 | 10 |
| IIIA | 130 | 96 | 55 | 34 | 24 | 19 |
| IIIB | 54  | 39 | 16 | 8  | 7  | 4  |

Supplement: NIHMS895569-supplement.pdf [file NIHMS895569-supplement.pdf]
